# Supplementary material
Source: publisher figshare collection journal article supplement (https://acs.figshare.com/ndownloader/files/34959999)
Supplement: Supplementary file 1 [file 34959999]

# Supporting Information

## Structural Engineering of The Barrier Oxide Layer of Nanoporous Anodic Alumina for Iontronic Sensing

Juan Wang<sup>1,2</sup>, Cheryl Suwen Law<sup>\*1,2,3</sup>, Satyathiran Gunenthiran<sup>1,2</sup>, Huong Nguyen Que Tran<sup>1,2</sup>, Khoa Tran<sup>1,2</sup>, Siew Yee Lim<sup>1,2</sup>, Andrew D. Abell<sup>\*2,4</sup>, and Abel Santos<sup>\*1,2</sup>

<sup>1</sup>School of Chemical Engineering and Advanced Materials, The University of Adelaide, South Australia 5005, Adelaide, Australia

<sup>2</sup>Institute for Photonics and Advanced Sensing, The University of Adelaide, South Australia 5005, Adelaide, Australia

<sup>3</sup>Monash Institute of Pharmaceutics Science, Monash University, Victoria 3052, Melbourne, Australia

<sup>4</sup>Department of Chemistry, The University of Adelaide, South Australia 5005, Adelaide, Australia

**\*E-Mail:** [suwen.law@adelaide.edu.au](mailto:suwen.law@adelaide.edu.au) ; [andrew.abell@adelaide.edu.au](mailto:andrew.abell@adelaide.edu.au) ; [abel.santos@adelaide.edu.au](mailto:abel.santos@adelaide.edu.au)

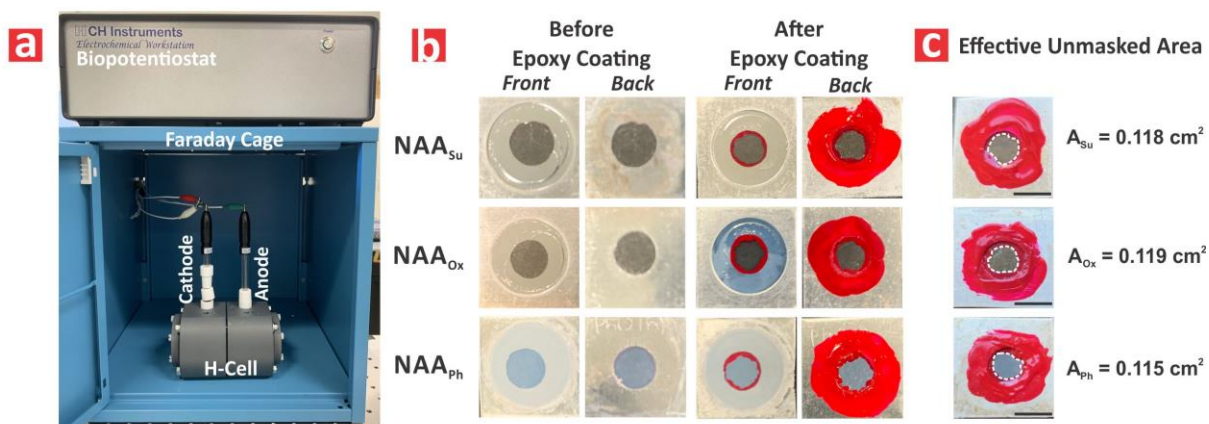

**Figure S1.** Iontronic characterization of NAA membranes. (a) Iontronic setup showing details of the H-cell comprising two half H cells between which NAA membranes were sandwiched, and electrodes immersed in KCl in each half H cell. (b) Digital pictures of NAA membranes (front and back) before and after coating. (c) Measurement of effective unmask area outlined by white dotted lines of three representative NAA membranes (scale bars: 0.5 cm; image analysis was performed using ImageJ).

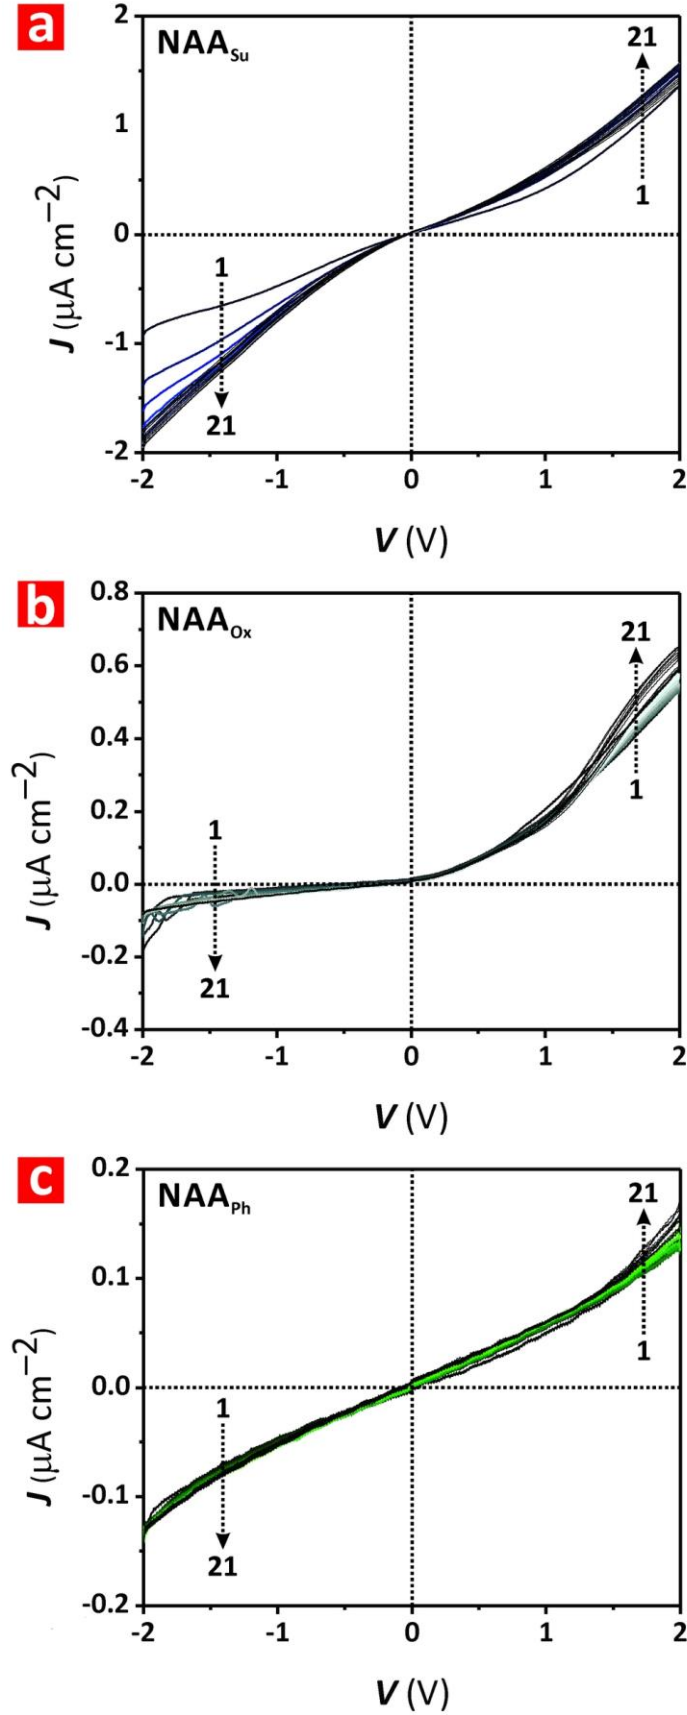

**Figure S2.** Dynamic change in ionic  $J$ - $V$  characteristic in Milli-Q water during 21 cycles of the reset process for NAA membranes produced by the two-step anodization process in (a) sulfuric, (b) oxalic, and (c) phosphoric acid electrolytes.

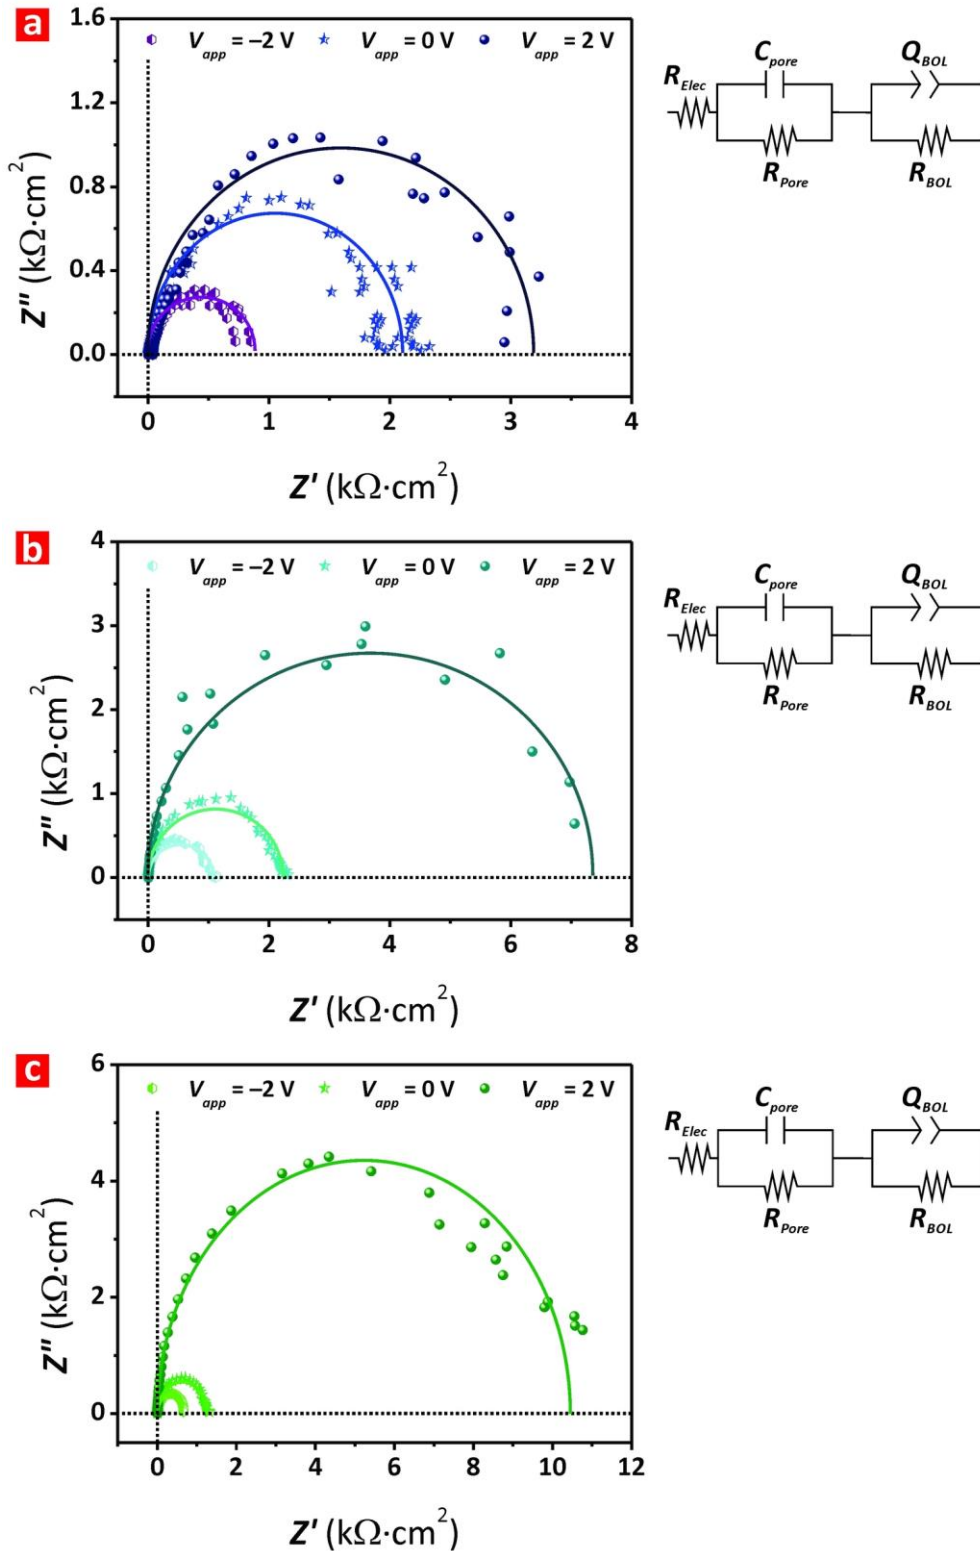

**Figure S3.** Nyquist impedance spectra and fitting lines of as-produced blind-hole NAA membranes in 0.1 M KCl electrolyte along with the equivalent circuit used to estimate key electronic parameters (NB:  $R_{Elec}$  = electrolyte resistance,  $R_{pore}$  = nanopore resistance,  $R_{BOL}$  = barrier oxide layer resistance,  $Q_{pore}$  = nanopore capacitance, and  $Q_{BOL}$  = barrier oxide layer capacitance). (a) NAA<sub>Su</sub> membranes at  $V_{app}$  = -2 V, 0 V, and 2 V. (b) NAA<sub>Ox</sub> membranes at  $V_{app}$  = -2 V, 0 V, and 2 V. (c) NAA<sub>Ph</sub> membranes at  $V_{app}$  = -2 V, 0 V, and 2 V.

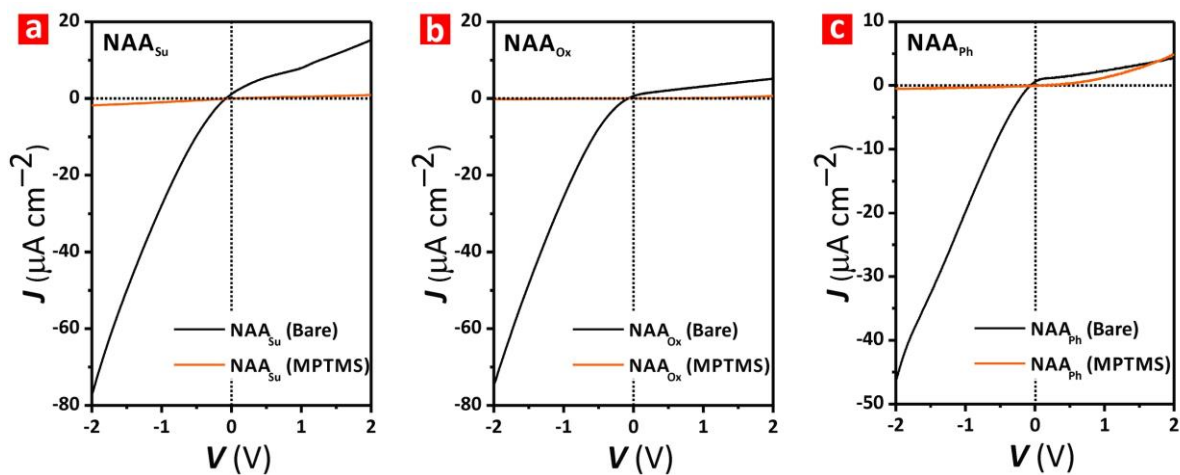

**Figure S4.** Ionic  $J$ - $V$  characteristic of blind-hole NAA membranes before in 0.1 M KCl at pH = 6 before and after MPTMS functionalization. (a)  $\text{NAA}_{\text{Su}}$  membranes. (b)  $\text{NAA}_{\text{Ox}}$  membranes. (c)  $\text{NAA}_{\text{Ph}}$  membranes.

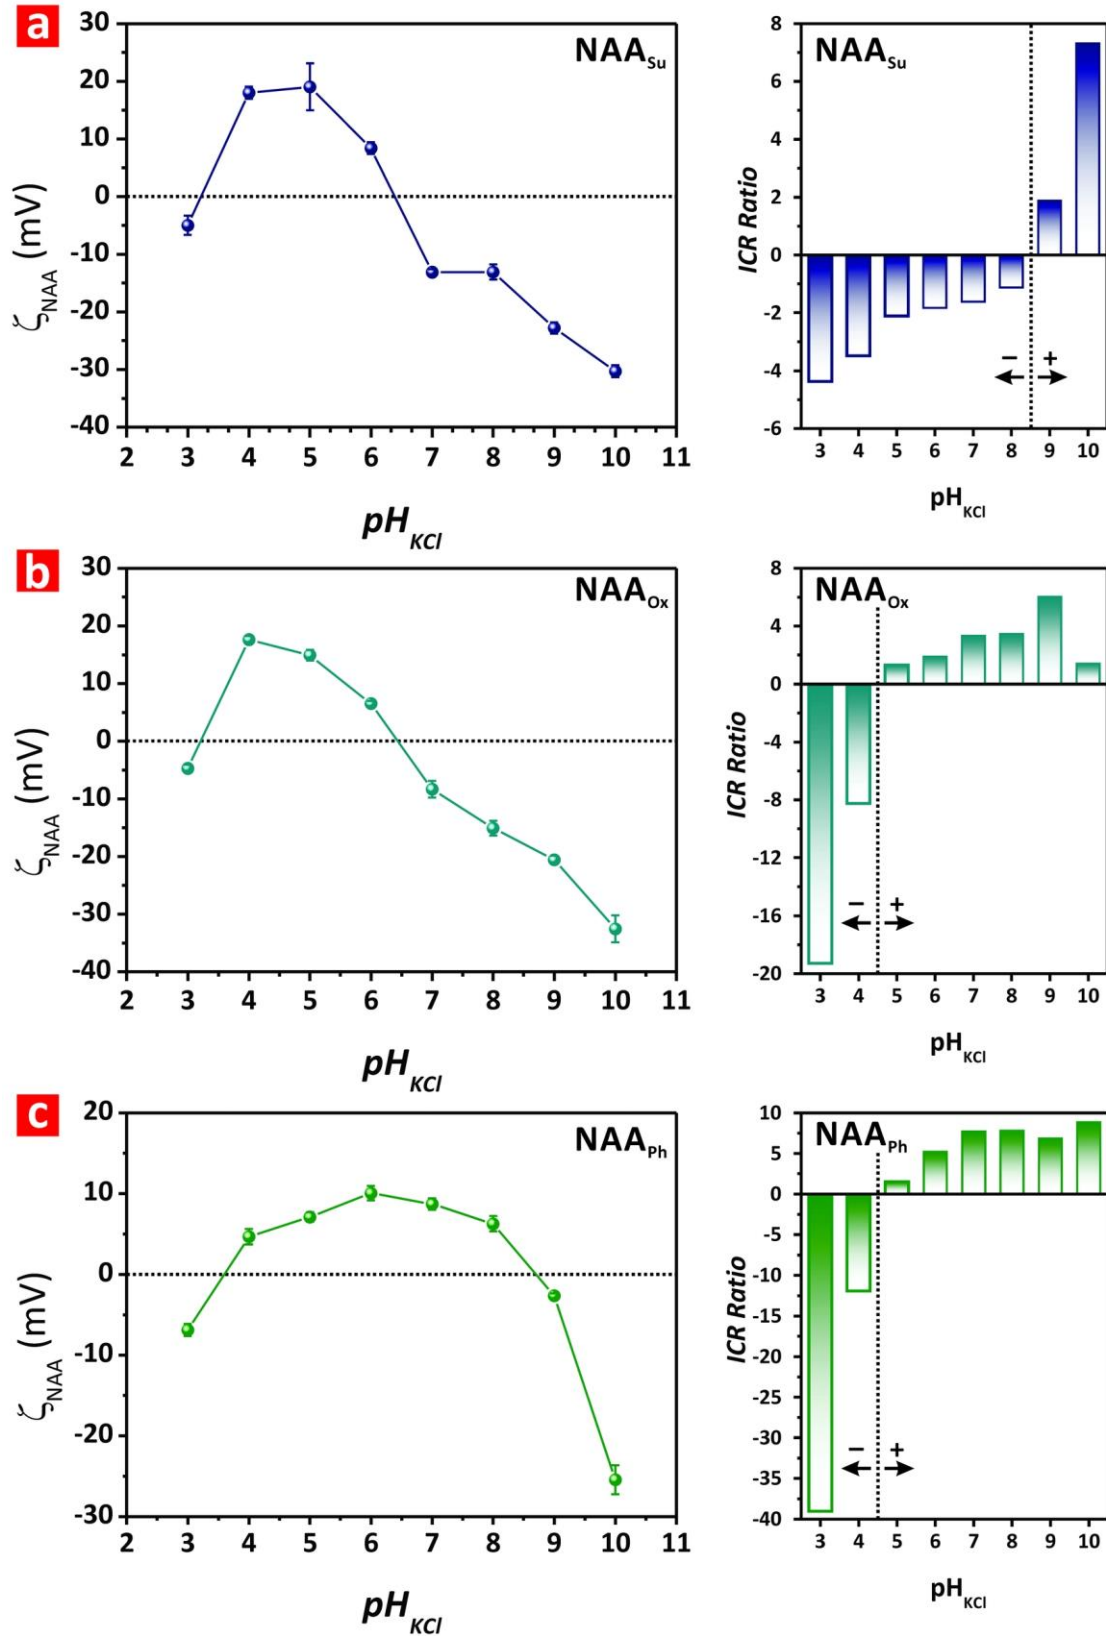

**Figure S5.** Dependence of zeta potential ( $\zeta_{\text{NAA}}$ ) and ionic current rectification (ICR) ratio in engineered MPTMS-functionalized NAA membranes with pH, from 3 to 10, in 0.1 M KCl (NB: all blind-hole NAA membranes were subjected to the reset process prior to J–V characterization). (a)  $\zeta_{\text{NAA}}$  (left) and ICR ratio (right) for  $\text{NAA}_{\text{Su}}$  membranes. (b)  $\zeta_{\text{NAA}}$  (left) and ICR ratio (right) for  $\text{NAA}_{\text{Ox}}$  membranes. (c)  $\zeta_{\text{NAA}}$  (left) and ICR ratio (right) for  $\text{NAA}_{\text{Ph}}$  membranes.

**Table S1.** Estimated values of key electronic parameters characterizing the impedance spectroscopy analysis shown in **Figure S1** (NB:  $R_{Elec}$  = electrolyte resistance,  $R_{Pore}$  = nanopore resistance,  $R_{BOL}$  = barrier oxide layer resistance,  $C_{Pore}$  = nanopore capacitance,  $C_{BOL}$  = barrier oxide layer capacitance,  $Q_{BOL}$  = barrier oxide layer pseudocapacitance,  $\epsilon_0$  = vacuum permittivity,  $\epsilon_r$  = relative permittivity of anodic aluminum oxide,  $\sigma_{BOL}$  = barrier oxide layer conductivity, and  $n$  = constant phase element component of the barrier oxide)<sup>†</sup>.

| <i>NAA</i>        | $V_{app}$<br>(V) | $R_{Elec}$<br>(k $\Omega$ ·cm <sup>2</sup> ) | $R_{Pore}$<br>(k $\Omega$ ·cm <sup>2</sup> ) | $R_{BOL}$<br>(k $\Omega$ ·cm <sup>2</sup> ) | $C_{Pore}$<br>( $\mu$ F·cm <sup>-2</sup> ) | $Q_{BOL}$<br>(s <sup>n</sup> $\Omega^{-1}$ ·cm <sup>-2</sup> ) | $n$   | $C_{BOL}$<br>( $\mu$ F·cm <sup>-2</sup> ) | $\sigma_{BOL}$<br>(nS·cm <sup>-1</sup> ) |
|-------------------|------------------|----------------------------------------------|----------------------------------------------|---------------------------------------------|--------------------------------------------|----------------------------------------------------------------|-------|-------------------------------------------|------------------------------------------|
| NAA <sub>Su</sub> | -2               | 0.0048                                       | 0.071                                        | 0.6                                         | 85.1                                       | 0.00006                                                        | 0.919 | 30.1                                      | 0.041                                    |
|                   | 0                | 0.0042                                       | 0.135                                        | 1.8                                         | 77.4                                       | 0.00008                                                        | 0.892 | 30.5                                      | 0.015                                    |
|                   | 2                | 0.0042                                       | 0.126                                        | 2.8                                         | 79.4                                       | 0.00008                                                        | 0.884 | 29.9                                      | 0.001                                    |
| NAA <sub>Ox</sub> | -2               | 0.0027                                       | 0.002                                        | 1.0                                         | 0.06                                       | 0.00001                                                        | 0.987 | 9.4                                       | 0.085                                    |
|                   | 0                | 0.0047                                       | 0.418                                        | 1.8                                         | 37.9                                       | 0.00003                                                        | 0.616 | 0.1                                       | 4.060                                    |
|                   | 2                | 0.0049                                       | 3.124                                        | 4.5                                         | 16.9                                       | 0.00006                                                        | 0.890 | 22.6                                      | 0.008                                    |
| NAA <sub>ph</sub> | -2               | 0.0041                                       | 0.252                                        | 0.5                                         | 7.6                                        | 0.000005                                                       | 0.992 | 4.3                                       | 0.434                                    |
|                   | 0                | 0.0041                                       | 0.092                                        | 1.2                                         | 1847.5                                     | 0.000003                                                       | 0.988 | 2.7                                       | 0.240                                    |
|                   | 2                | 0.0041                                       | 1.124                                        | 8.3                                         | 94.5                                       | 0.00004                                                        | 0.914 | 16.0                                      | 0.006                                    |

<sup>†</sup>Values estimated from **Equations S1 and S2**

$$C_{BOL} = Q_{BOL}^{1/n} \cdot \left( \frac{1}{R_{Elec}} + \frac{1}{R_{BOL}} \right)^{n-1/n} \quad (S1)$$

$$\sigma_{BOL} = \frac{\epsilon_r \cdot \epsilon_0}{R_{BOL} \cdot C_{BOL}} \quad (S2)$$
